# Supplementary material for: Hashimoto’s Thyroiditis: A Protective Factor against Recurrence in BRAF-Wild Type Differentiated Thyroid Carcinoma
Source: MDPI journal article supplement (doi:10.3390/cancers15082371), 2023-04-19
Supplement: s1 [file s1]

**Supplemental Table S1.** Baseline characteristics of differentiated thyroid cancer patients who underwent thyroid surgery with subgroup analysis based on genetic mutation status. Two-sided Chi-Square, Student's t, and Mann-Whitney U tests were used.

| Characteristics               | Levels       | Total       | BRAF wild type | BRAF mutation | <i>p</i> -value |
|-------------------------------|--------------|-------------|----------------|---------------|-----------------|
| <b>Number</b>                 |              | 469         | 321 (68.4%)    | 128 (31.6%)   |                 |
| <b>Management</b>             |              |             |                |               |                 |
| Risk Group                    | Low          | 275 (58.6%) | 240 (74.8%)    | 35 (23.6%)    | <0.001          |
|                               | Intermediate | 137 (29.2%) | 54 (16.8%)     | 83 (56.1%)    |                 |
|                               | High         | 27 (8.4%)   | 30 (20.3%)     | 57 (12.2%)    |                 |
| RAI treatment                 | Positive     | 167 (35.6%) | 109 (34.0%)    | 58 (39.2%)    | 0.27            |
| <b>Pathological data</b>      |              |             |                |               |                 |
| Tumor type                    | PTC          | 427 (91.0%) | 282 (87.9%)    | 145 (98%)     | 0.001           |
|                               | FTC          | 25 (5.3%)   | 25 (7.8%)      | 0 (0%)        |                 |
|                               | PTC+FTC      | 17 (3.6%)   | 14 (4.4%)      | 3 (2.0%)      |                 |
| PTMC                          | Positive     | 175 (37.3%) | 129 (40.2%)    | 46 (31.1%)    | 0.05            |
| T stage                       | T1           | 324 (69.1%) | 231 (72%)      | 93 (62.8%)    | 0.052           |
|                               | T2           | 67 (14.3)   | 47 (14.6%)     | 20 (13.5%)    |                 |
|                               | T3           | 69 (14.7)   | 38 (11.8%)     | 31 (20.9%)    |                 |
|                               | T4           | 9 (1.9)     | 5 (1.6%)       | 4 (2.7%)      |                 |
| N stage                       | N0           | 360 (76.8%) | 274 (85.4%)    | 86 (58.1%)    | <0.001          |
|                               | N1           | 109 (23.2%) | 47 (14.6%)     | 62 (41.9%)    |                 |
| M stage                       | M0           | 453 (96.6%) | 311 (96.9%)    | 142 (95.9%)   | 0.60            |
|                               | M1           | 16 (3.4%)   | 10 (3.1%)      | 6 (4.1%)      |                 |
|                               | Bilateral    | 127 (27.1%) | 69 (21.5%)     | 58 (39.2%)    |                 |
| Extrathyroidal extension      | Positive     | 54 (11.5%)  | 21 (6.5%)      | 33 (22.3%)    | <0.001          |
| Angioinvasion                 | Positive     | 48 (10.2%)  | 35 (10.9%)     | 13 (8.8%)     | 0.48            |
| Perineural invasion           | Positive     | 5 (1.1%)    | 3 (0.9%)       | 2 (1.4%)      | 0.68            |
| Capsular invasion             | Positive     | 126 (26.9%) | 84 (26.2%)     | 42 (28.4%)    | 0.61            |
| Extra nodal extension         | Positive     | 39 (8.3%)   | 16 (5.0%)      | 23 (15.5%)    | <0.001          |
| Central lymph node metastasis | Positive     | 106 (22.6%) | 48 (15%)       | 58 (39.2%)    | <0.001          |
| Lateral lymph node metastasis | Positive     | 65 (13.9%)  | 30 (9.3%)      | 35 (23.6%)    | <0.001          |
| Hashimoto thyroiditis         | Positive     | 140 (29.9%) | 96 (29.9%)     | 44 (29.7%)    | 0.96            |
| <b>Outcomes</b>               |              |             |                |               |                 |
| Recurrence                    | Negative     | 426 (90.8%) | 300 (93.5%)    | 126 (85.1%)   | 0.004           |
|                               | Positive     | 43 (9.2%)   | 21 (6.5%)      | 22 (14.9%)    |                 |
